# Supplementary material
Source: publisher figshare collection journal article supplement (https://karger.figshare.com/ndownloader/files/27685383)
Supplement: Supplementary file 1 [file 27685383]

Online supplementary Figure 1: PRISMA diagram for selection of studies.

Online supplementary Figure 2: Random effects model for acute rejection rates at 6 months post-transplant.

Online supplementary Figure 3: Random effects model for graft survival at one year post-transplant.

Online supplementary Figure 4: Forest plot analysis for overall patient survival.

Online supplementary Figure 5: Forest plot analysis for patient survival at one-year post-transplant.

Online supplementary Figure 6: Random effects model for delayed graft function.

Online supplementary Figure 7: Random effects model for CMV infection.

Online supplementary Figure 8: Random effects model for malignancy.

Online supplementary Figure 9: Overall acute rejection rates among studies comparing induction versus no-induction therapy among patients maintained on triple immunotherapy (steroids, tacrolimus and MMF).

Online supplementary Figure 10: Overall graft survival among studies comparing induction versus no-induction therapy among patients maintained on triple immunotherapy (steroids, tacrolimus and MMF).

Online supplementary Figure 11: Overall patient survival among studies comparing induction versus no-induction therapy among patients maintained on triple immunotherapy (steroids, tacrolimus and MMF).

Online supplementary Figure 12: Acute rejection rates in studies using IL2-RA induction therapy and low dose tacrolimus versus no induction therapy and high dose tacrolimus.
